# Supplementary material
Source: MDPI journal article supplement (https://www.mdpi.com/2076-3417/11/14/6600)
Supplement: s1 [file s1]

# Raman Spectrometry as a Tool for an Online Control of a Phototrophic Biological Nutrient Removal Process

Rita D. G. Franca<sup>1,2</sup>, Virgínia C. F. Carvalho<sup>1,2</sup>, Joana C. Fradinho<sup>1,2</sup>,  
Maria A. M. Reis<sup>1,2</sup> and Nídia D. Lourenço<sup>1,2,\*</sup>

<sup>1</sup> Associate Laboratory i4HB–Institute for Health and Bioeconomy, NOVA School of Science and Technology, NOVA University Lisbon, 2829-516 Caparica, Portugal; r.franca@campus.fct.unl.pt (R.D.G.F.); virginiafcfcarvalho@gmail.com (V.C.F.C.); j.fradinho@campus.fct.unl.pt (J.C.F.); amr@fct.unl.pt (M.A.M.R.)

<sup>2</sup> UCIBIO—Applied Molecular Biosciences Unit, Department of Chemistry, NOVA School of Science and Technology, NOVA University Lisbon, 2829-516 Caparica, Portugal

\* Correspondence: nidia.lourenco@fct.unl.pt

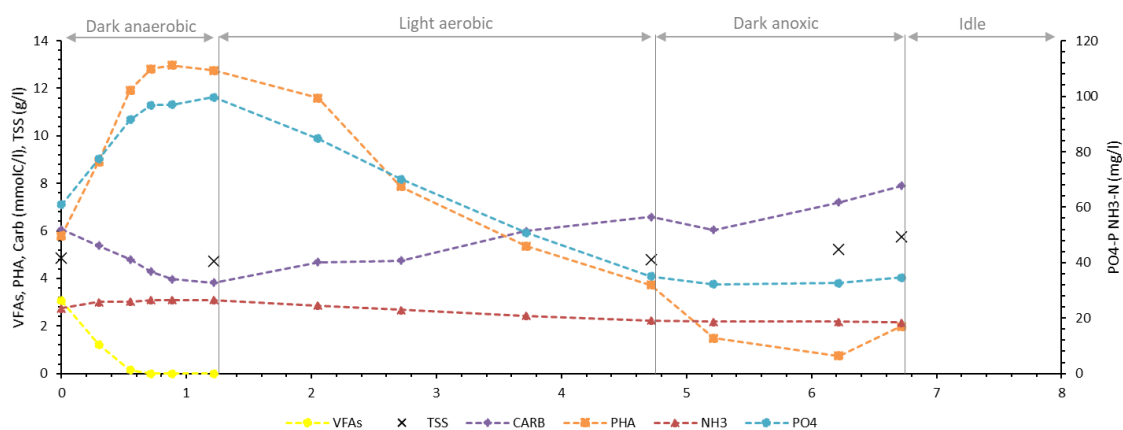

**Figure S1.** Full cycle of the photo-BNR reactor on day 85 of system operation. Carbohydrates correspond to the sum of bacterial intracellular glycogen and microalgae starch. For details on system operation, please see [14].

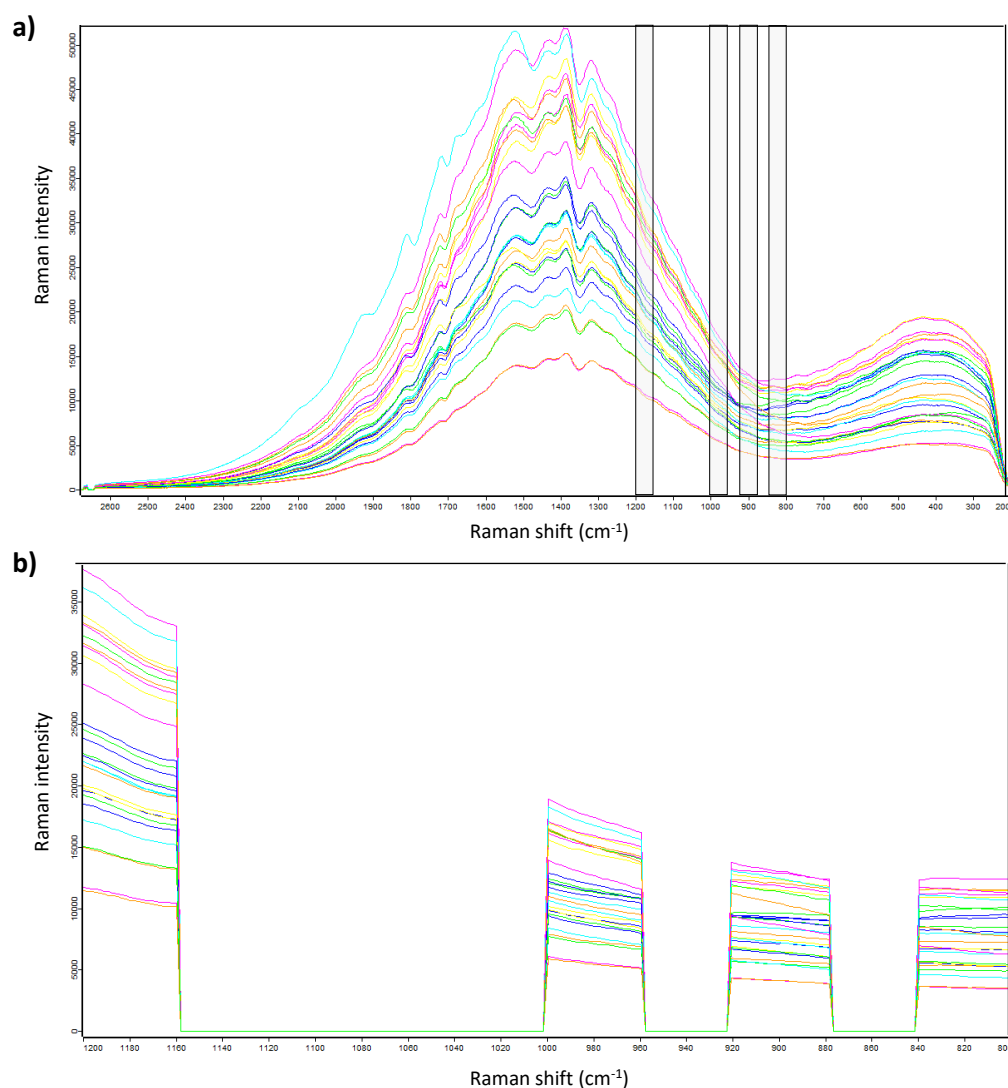

**Figure S2.** Pre-processed Raman spectra of calibration samples used for the development of the PLS model for total carbohydrates, according to Table 1 in the manuscript: **a)** representation of the total calibration spectra after pre-processing, highlighting the specific Raman shift regions considered during PLS model optimization; and **b)** representation of the spectral data effectively considered in the PLS model, corresponding to the optimized pre-processed Raman spectra.

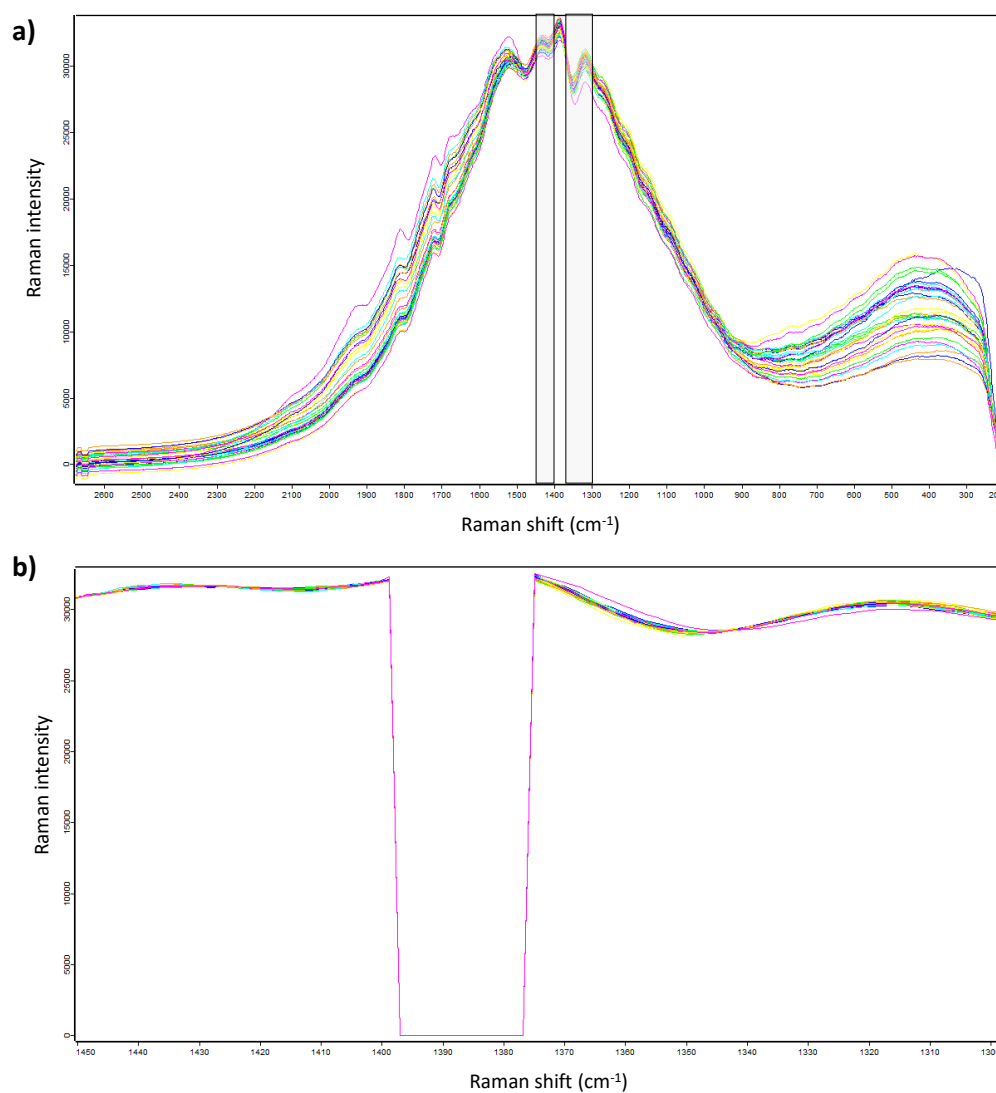

**Figure S3.** Pre-processed Raman spectra of calibration samples used for the development of the PLS model for carbon dioxide (CO<sub>2</sub>), according to Table 1 in the manuscript: **a)** representation of the total calibration spectra after pre-processing, highlighting the specific Raman shift regions considered during PLS model optimization; and **b)** representation of the spectral data effectively considered in the PLS model, corresponding to the optimized pre-processed Raman spectra.

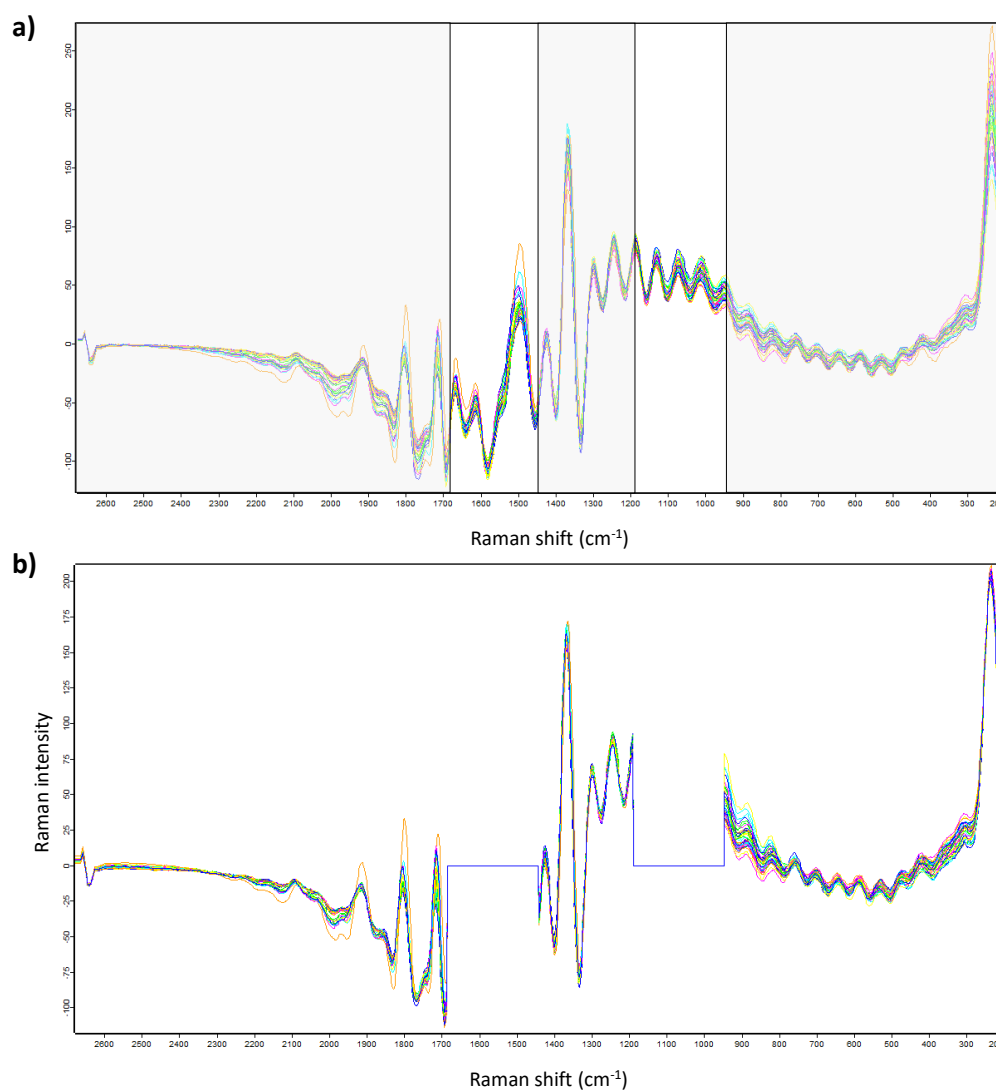

**Figure S4.** Pre-processed Raman spectra of calibration samples used for the development of the PLS model for ammonia ( $\text{NH}_3$ ), according to Table 1 in the manuscript: **a)** representation of the total calibration spectra after pre-processing, highlighting the specific Raman shift regions considered during PLS model optimization; and **b)** representation of the spectral data effectively considered in the PLS model, corresponding to the optimized pre-processed Raman spectra.

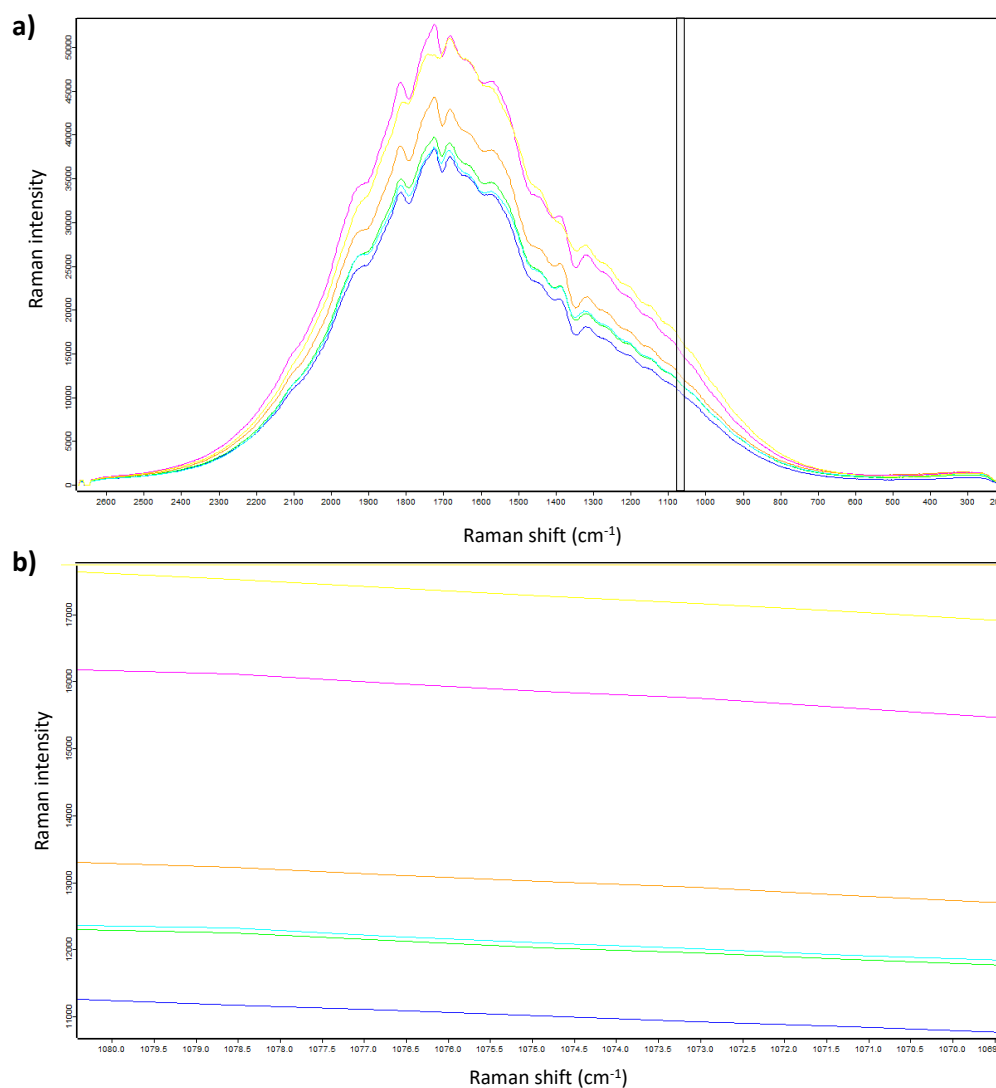

**Figure S5.** Pre-processed Raman spectra of calibration samples used for the development of the PLS model for nitrate ( $\text{NO}_3$ ), according to Table 1 in the manuscript: **a)** representation of the total calibration spectra after pre-processing, highlighting the specific Raman shift regions considered during PLS model optimization; and **b)** representation of the spectral data effectively considered in the PLS model, corresponding to the optimized pre-processed Raman spectra.

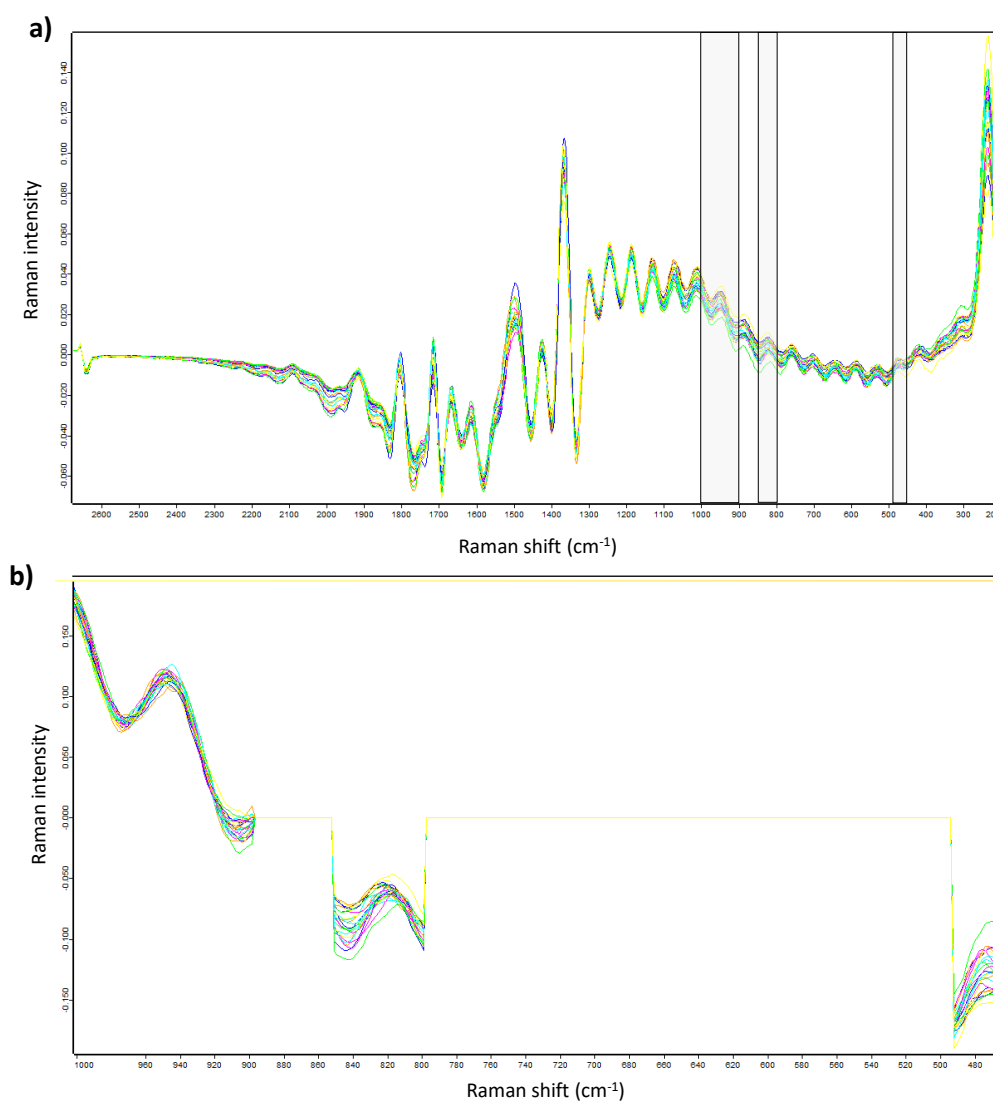

**Figure S6.** Pre-processed Raman spectra of calibration samples used for the development of the PLS model for polyhydroxyalkanoates (PHAs), according to Table 1 in the manuscript: **a)** representation of the total calibration spectra after pre-processing, highlighting the specific Raman shift regions considered during PLS model optimization; and **b)** representation of the spectral data effectively considered in the PLS model, corresponding to the optimized pre-processed Raman spectra.

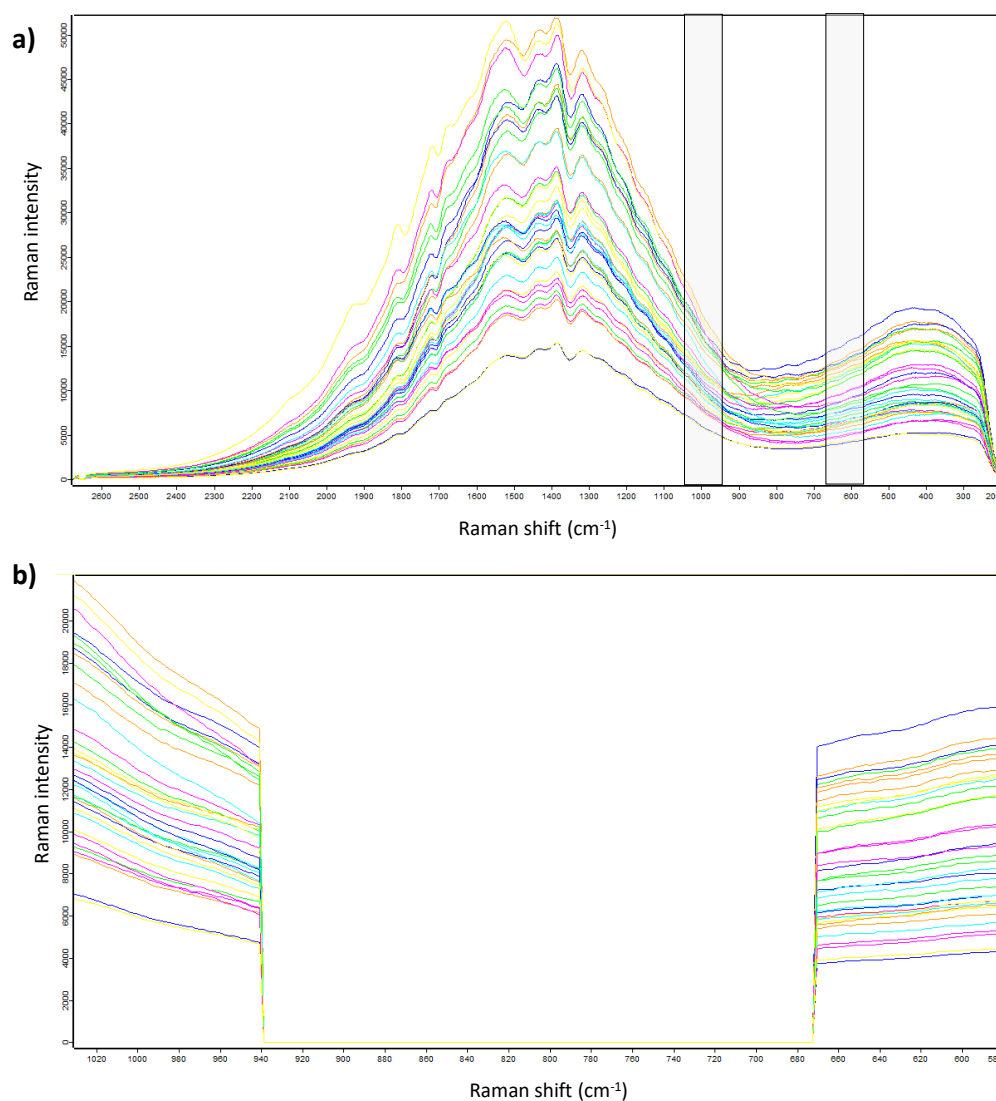

**Figure S7.** Pre-processed Raman spectra of calibration samples used for the development of the PLS model for phosphate ( $\text{PO}_4$ ), according to Table 1 in the manuscript: **a)** representation of the total calibration spectra after pre-processing, highlighting the specific Raman shift regions considered during PLS model optimization; and **b)** representation of the spectral data effectively considered in the PLS model, corresponding to the optimized pre-processed Raman spectra.

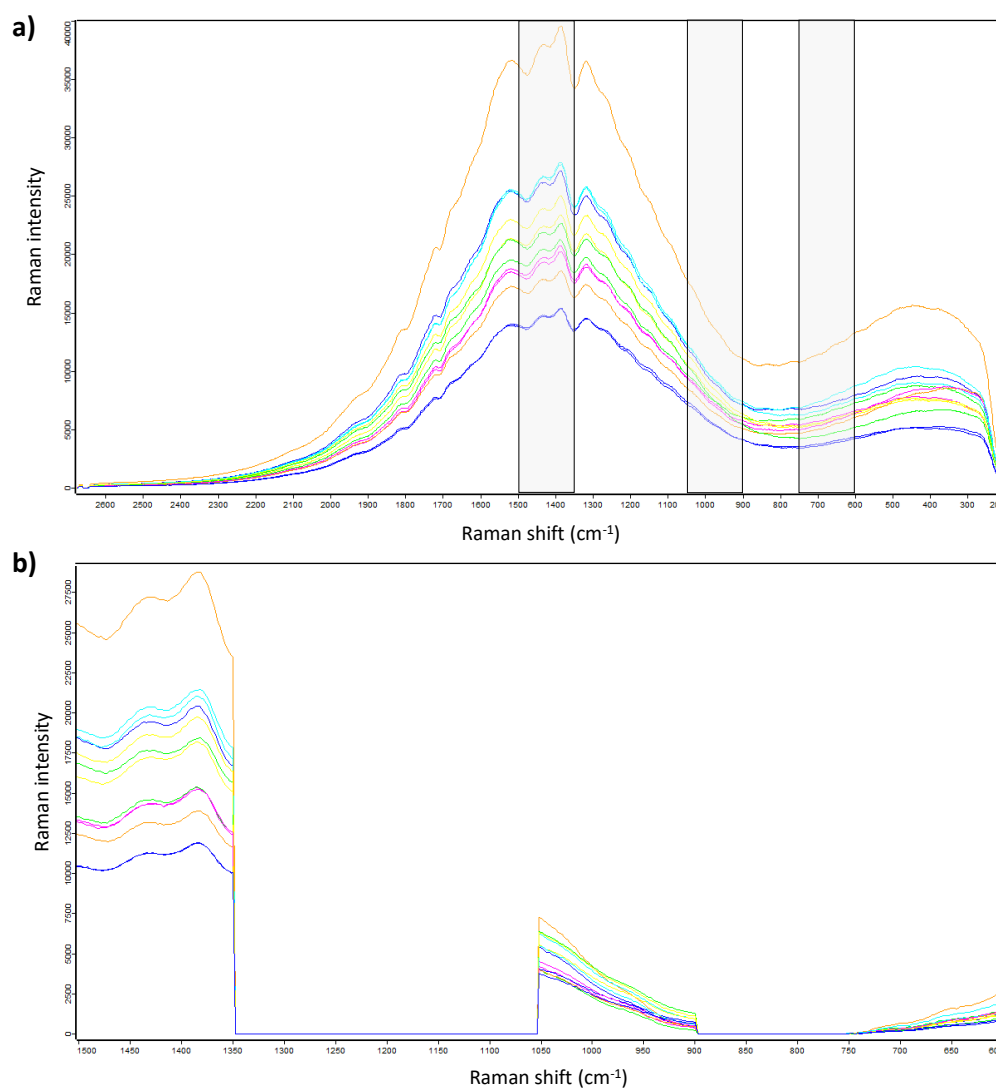

**Figure S8.** Pre-processed Raman spectra of calibration samples used for the development of the PLS model for total organic content (TOC), according to Table 1 in the manuscript: **a)** representation of the total calibration spectra after pre-processing, highlighting the specific Raman shift regions considered during PLS model optimization; and **b)** representation of the spectral data effectively considered in the PLS model, corresponding to the optimized pre-processed Raman spectra.



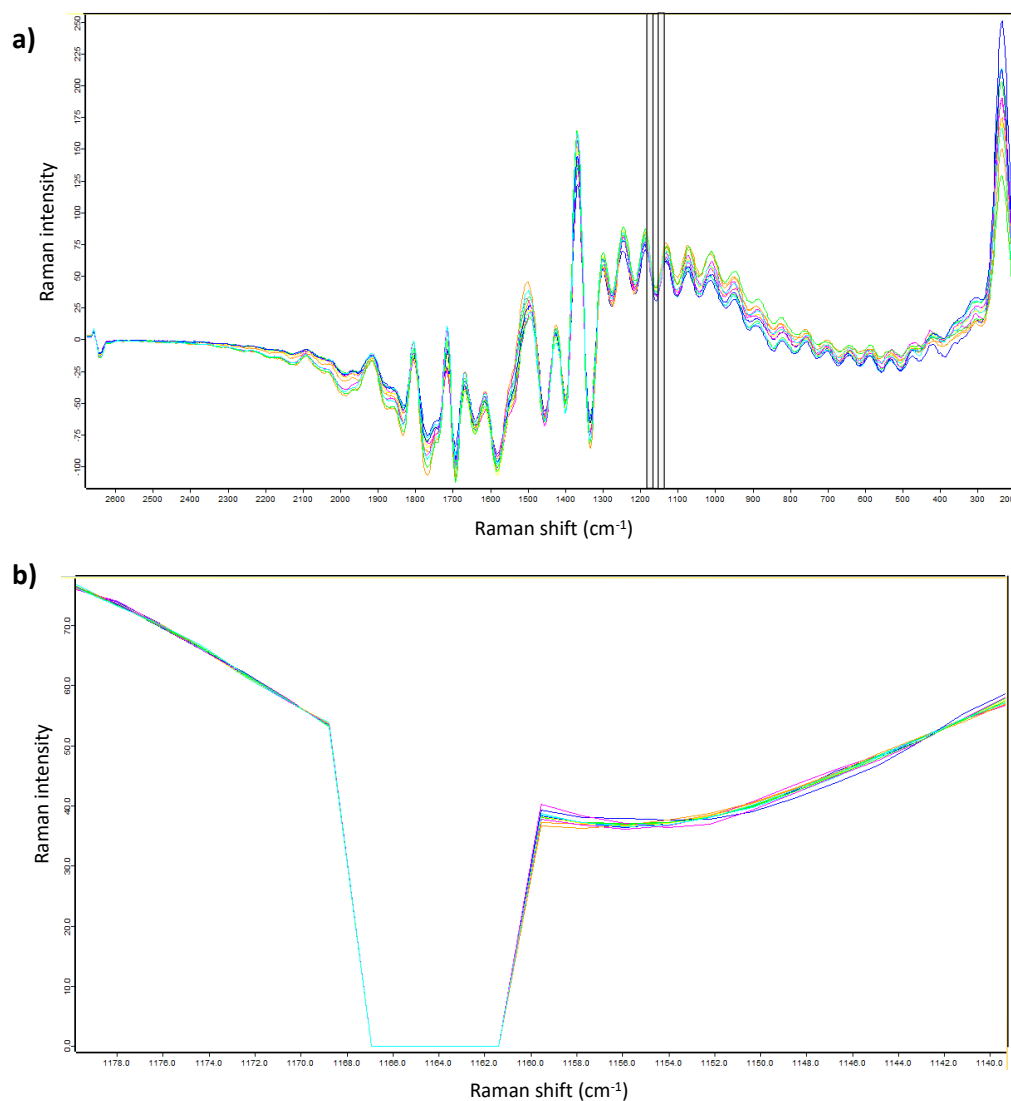

**Figure S9.** Pre-processed Raman spectra of calibration samples used for the development of the PLS model for total phosphorus (total P), according to Table 1 in the manuscript: **a)** representation of the total calibration spectra after pre-processing, highlighting the specific Raman shift regions considered during PLS model optimization; and **b)** representation of the spectral data effectively considered in the PLS model, corresponding to the optimized pre-processed Raman spectra.

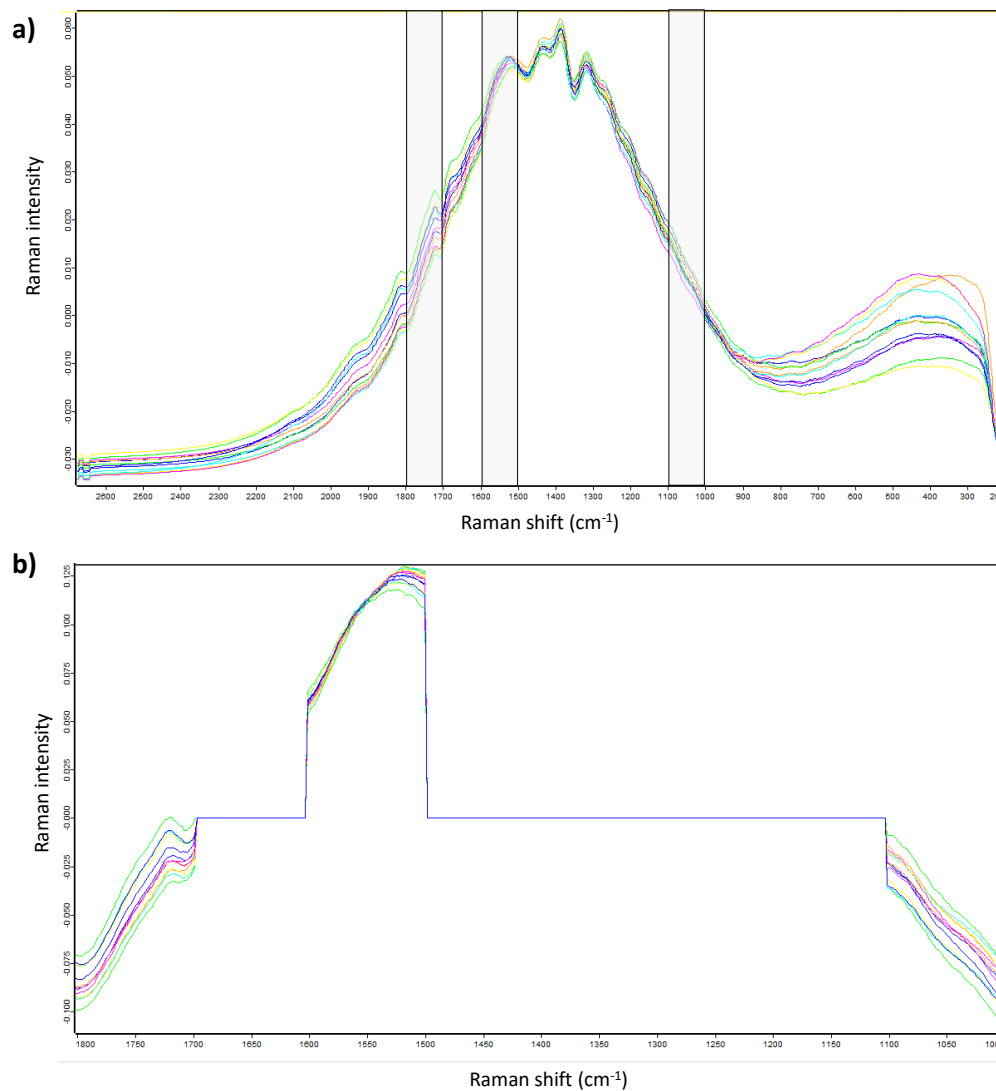

**Figure S10.** Pre-processed Raman spectra of calibration samples used for the development of the PLS model for total suspended solids (TSSs), according to Table 1 in the manuscript: **a)** representation of the total calibration spectra after pre-processing, highlighting the specific Raman shift regions considered during PLS model optimization; and **b)** representation of the spectral data effectively considered in the PLS model, corresponding to the optimized pre-processed Raman spectra.

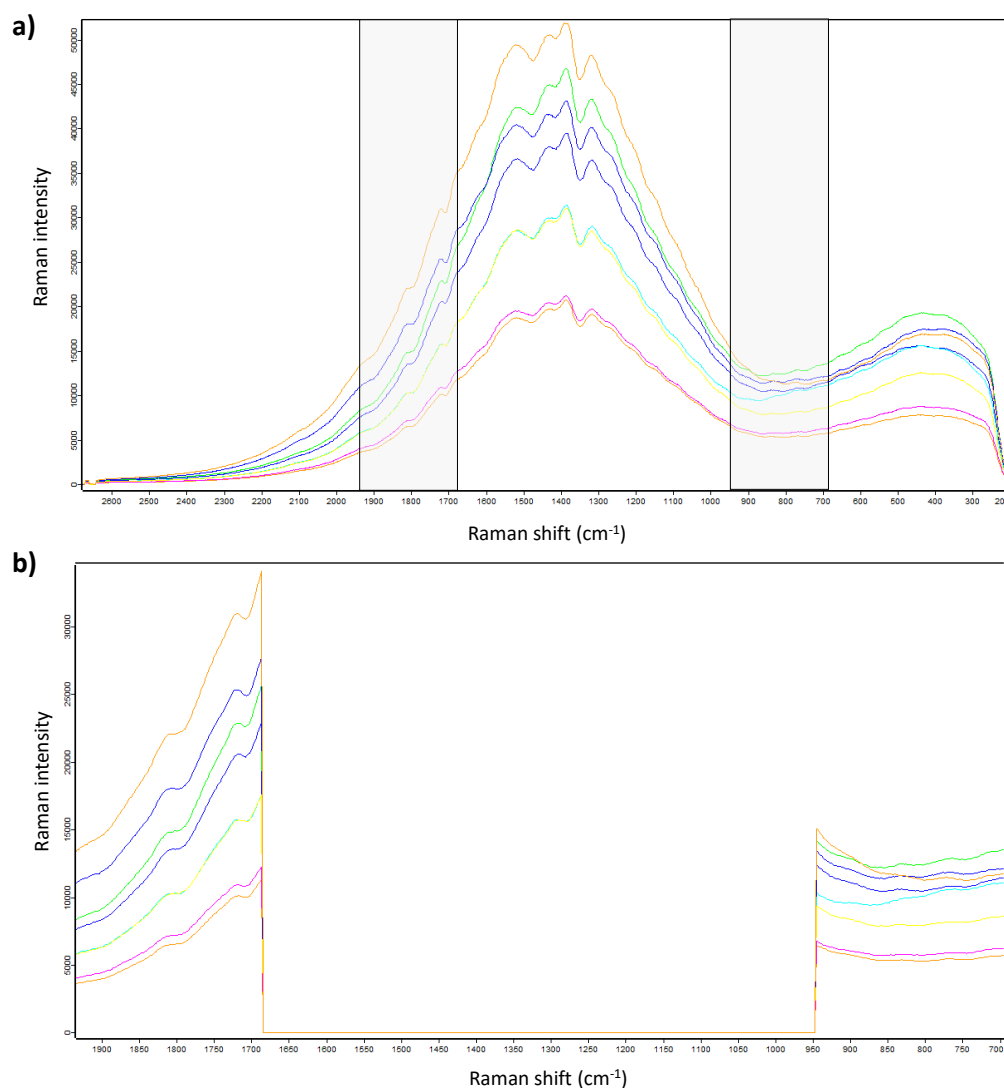

**Figure S11.** Pre-processed Raman spectra of calibration samples used for the development of the PLS model for volatile fatty acids (VFAs), according to Table 1 in the manuscript: **a)** representation of the total calibration spectra after pre-processing, highlighting the specific Raman shift regions considered during PLS model optimization; and **b)** representation of the spectral data effectively considered in the PLS model, corresponding to the optimized pre-processed Raman spectra.

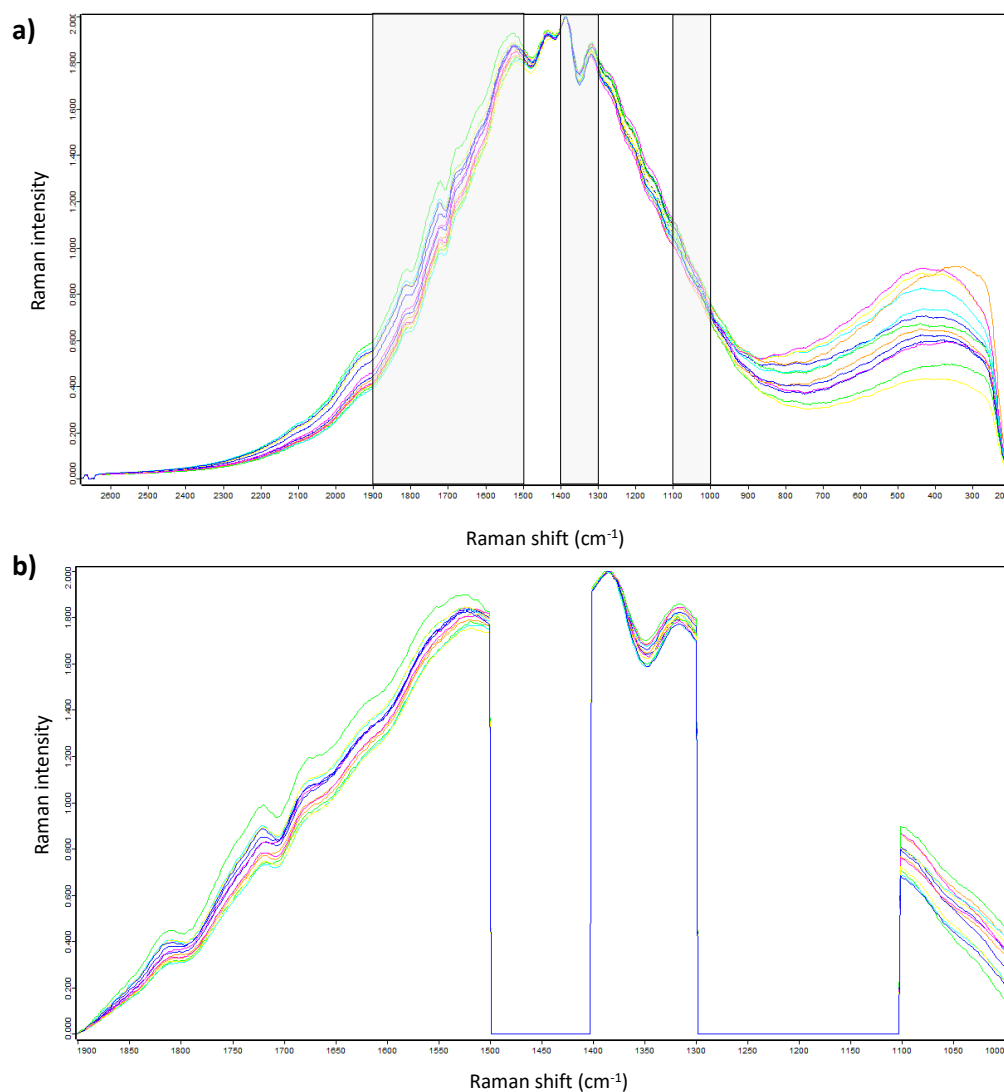

**Figure S12.** Pre-processed Raman spectra of calibration samples used for the development of the PLS model for volatile suspended solids (VSSs), according to Table 1 in the manuscript: **a)** representation of the total calibration spectra after pre-processing, highlighting the specific Raman shift regions considered during PLS model optimization; and **b)** representation of the spectral data effectively considered in the PLS model, corresponding to the optimized pre-processed Raman spectra.
